# Supplementary material for: Integrative functional analyses using rainbow trout selected for tolerance to plant diets reveal nutrigenomic signatures for soy utilization without the concurrence of enteritis
Source: PLoS One. 2017 Jul 19;12(7):e0180972. doi: 10.1371/journal.pone.0180972 (PMC5517010; doi:10.1371/journal.pone.0180972)
Supplement: S11 Table — (XLSX) [file pone.0180972.s013.xlsx]

## Sheet: muscle ENTERITIS DEGs
gene	fold_change	padj	description
C52837_c0_seq1_	2.8649	9.89772e-05	_PREDICTED:_leucine-rich_repeat-containing_protein_58-like_[Oreochromis_niloticus]
C52522_c1_seq1_	2.51025	0.000106339	_solute_carrier_family_7,_member_3_[Danio_rerio]
C22806_c4_seq1_	2.3886	0.00791953	_PREDICTED:_transposon_TX1_uncharacterized_149_kDa_protein-like_[Danio_rerio]
C33870_c1_seq1_	2.32099	0.0185621	_PREDICTED:_bromodomain-containing_protein_8-like_[Danio_rerio]
C47889_c5_seq1_	2.29829	0.00964989	_fimbriae-associated_protein_Fap1_[Streptococcus_parasanguinis]
C116627_c0_seq1_	2.29336	0.00964989	_PREDICTED:_sestrin-1-like_[Oreochromis_niloticus]
C97882_c1_seq1_	2.21234	0.0185621	_insulin-like_growth_factor_binding_protein-1a_[Oncorhynchus_mykiss]
C45133_c0_seq1_	2.14823	0.0212478	_Cyclic_AMP-dependent_transcription_factor_ATF-3_[Salmo_salar]
C1317_c37_seq1_	2.03612	0.0224461	_insulin_receptor_c_[Oncorhynchus_mykiss]
C79299_c0_seq1_	1.97857	0.0040538	_heparin-binding_EGF-like_growth_factor_precursor_[Danio_rerio]_gb
C66653_c0_seq1_	1.94257	0.0440345	_C-1-tetrahydrofolate_synthase,_cytoplasmic_[Salmo_salar]_gb
C74508_c0_seq1_	1.888	0.034525	_C-1-tetrahydrofolate_synthase,_cytoplasmic_[Salmo_salar]_gb
C157395_c0_seq1_	1.83922	0.00481638	_uncharacterized_protein_LOC566969_[Danio_rerio]_emb
C10620_c0_seq1_	1.81496	0.0460033	_CHCH_domain-containing_protein_C22orf16,_mitochondrial_precursor_[Salmo_salar]
C50260_c0_seq1_	1.80549	0.034086	_PREDICTED:_lysosomal_alpha-glucosidase-like_[Oreochromis_niloticus]
C195722_c0_seq1_	1.79879	0.0185621	_unnamed_protein_product_[Tetraodon_nigroviridis]
C7254_c5_seq1_	1.79798	0.00938614	_Sodium-coupled_neutral_amino_acid_transporter_2_[Salmo_salar]_gb
C10637_c0_seq1_	1.77768	0.0398398	_Serine_hydroxymethyltransferase,_mitochondrial_precursor_[Salmo_salar]
C4323_c2_seq1_	1.73648	0.0460033	_Ucp2l_protein_[Danio_rerio]
C48314_c0_seq1_	1.7343	0.0231051	_uncharacterized_protein_LOC100145393_[Xenopus_(Silurana)_tropicalis]_gb
C20694_c0_seq1_	1.73399	0.0409662	_glucose_transporter_1A_[Oncorhynchus_mykiss]_gb
C4806_c1_seq1_	1.72879	0.0376016	_glycogen_synthase_kinase_binding_protein_[Oncorhynchus_mykiss]_gb
C75994_c0_seq1_	1.70782	0.00791953	_PREDICTED:_probable_10-formyltetrahydrofolate_dehydrogenase_ALDH1L2-like_[Danio_rerio]
C79_c0_seq1_	1.697	0.0115917	_non-metastatic_cells_1_protein_[Salmo_salar]_gb
C10510_c0_seq1_	1.6951	0.0040538	_eukaryotic_translation_initiation_factor_5A-2_[Salmo_salar]_gb
C12793_c0_seq1_	1.67309	0.0475269	_PREDICTED:_hypothetical_protein_LOC100708672_[Oreochromis_niloticus]
C13369_c0_seq1_	1.67223	0.0408501	_hypothetical_protein_CLUG_04845_[Clavispora_lusitaniae_ATCC_42720]_gb
C91547_c0_seq1_	1.67097	0.0185621	_Pik3r2_protein_[Danio_rerio]
C139221_c0_seq1_	1.66848	0.048731	_PQ_loop_repeat-containing_protein_3_precursor_[Salmo_salar]_gb
C74623_c0_seq1_	1.66518	0.0408501	_PREDICTED:_pyruvate_dehydrogenase_[lipoamide]_kinase_isozyme_2-like_[Oreochromis_niloticus]
C8573_c0_seq1_	1.64076	0.0460033	_unnamed_protein_product_[Tetraodon_nigroviridis]
C64386_c1_seq1_	1.64001	0.0312305	_PREDICTED:_chromodomain-helicase-DNA-binding_protein_9_[Oreochromis_niloticus]
C68606_c0_seq1_	1.62724	0.0455448	_PREDICTED:_arf-GAP_domain_and_FG_repeats-containing_protein_1-like_[Oreochromis_niloticus]
C660_c8_seq1_	1.62537	0.0455448	_PREDICTED:_retrotransposable_element_Tf2_155_kDa_protein_type_1-like_[Danio_rerio]
C17603_c0_seq1_	1.5949	0.0360812	_PREDICTED:_pleckstrin_homology_domain-containing_family_A_member_7-like_[Oreochromis_niloticus]
C68654_c0_seq1_	1.56052	0.0140913	_PREDICTED:_serine/threonine-protein_kinase_SRPK3-like_[Oreochromis_niloticus]
C14367_c2_seq1_	1.51733	0.0185621	_vacuole_membrane_protein_1_[Danio_rerio]_sp
C1142_c0_seq1_	1.51604	0.00964989	_aspartic_acid-rich_protein_aspolin2_[Gadus_chalcogrammus]
C34014_c1_seq1_	1.49151	0.0440345	_FXYD_domain_containing_ion_transport_regulator_8_precursor_[Salmo_salar]_tpg
C103499_c1_seq1_	1.48966	0.0293153	_PREDICTED:_phosphatidylinositol_3,4,5-trisphosphate-dependent_Rac_exchanger_2_protein_[Oreochromis_niloticus]
C2683_c2_seq1_	1.47254	0.034086	_Elongation_factor_1-delta_[Salmo_salar]_gb
C21014_c0_seq1_	1.46064	0.0295705	_Echinoderm_microtubule-associated_protein-like_1_[Salmo_salar]
C398_c0_seq1_	1.44921	0.0224461	_pyruvate_kinase_[Salmo_salar]_gb
C11043_c0_seq1_	1.44461	0.0460886	_PREDICTED:_probable_threonyl-tRNA_synthetase_2,_cytoplasmic-like_[Oreochromis_niloticus]
C39083_c0_seq1_	1.44339	0.0189629	_unnamed_protein_product_[Tetraodon_nigroviridis]
C11377_c0_seq1_	1.44025	0.00964989	_PREDICTED:_dehydrogenase/reductase_SDR_family_member_7C-A-like_[Oreochromis_niloticus]
C48428_c1_seq1_	1.42692	0.0425307	_vacuolar_protein_sorting-associated_protein_8_homolog_[Danio_rerio]
C31193_c5_seq1_	1.42667	0.0185621	_unnamed_protein_product_[Tetraodon_nigroviridis]
C4864_c2_seq1_	1.42045	0.0287862	_serine/threonine-protein_phosphatase_PP1-beta_catalytic_subunit_[Salmo_salar]_gb
C8343_c5_seq1_	1.41886	0.00428105	_PREDICTED:_liprin-beta-2-like_[Oreochromis_niloticus]
C35294_c1_seq1_	1.4177	0.0441031	_cAMP-dependent_protein_kinase_inhibitor_gamma_[Esox_lucius]
C9377_c0_seq1_	1.41361	0.034086	_junctophilin-2_[Danio_rerio]_gb
C35439_c0_seq1_	1.41256	0.0425307	_PREDICTED:_general_transcription_factor_II-I_repeat_domain-containing_protein_1_[Oreochromis_niloticus]
C135_c1_seq1_	1.41228	0.0425307	_PREDICTED:_sarcoplasmic/endoplasmic_reticulum_calcium_ATPase_1-like_[Oreochromis_niloticus]
C516_c0_seq1_	1.38824	0.0142208	_40S_ribosomal_protein_SA_[Salmo_salar]_sp
C42215_c1_seq1_	1.37325	0.0142208	_PREDICTED:_eukaryotic_elongation_factor_2_kinase_[Oreochromis_niloticus]
C18896_c3_seq1_	1.37039	0.0312305	_PREDICTED:_myosin_phosphatase_Rho-interacting_protein-like_[Oreochromis_niloticus]
C9919_c46_seq1_	1.35885	0.0185621	_unnamed_protein_product_[Tetraodon_nigroviridis]
C5420_c0_seq1_	1.35113	0.0408501	_Coiled-coil-helix-coiled-coil-helix_domain-containing_protein_3,_mitochondrial_precursor_[Salmo_salar]
C6829_c0_seq1_	1.33436	0.0257162	_amylo-1,_6-glucosidase,_4-alpha-glucanotransferase_[Danio_rerio]
C21276_c2_seq1_	1.33255	0.0460033	_PREDICTED:_hypothetical_protein_LOC100703121_[Oreochromis_niloticus]
C93217_c2_seq1_	1.32411	0.034525	_unnamed_protein_product_[Tetraodon_nigroviridis]
C1299_c0_seq1_	1.3129	0.0231539	_phosphoglucomutase-1_[Salmo_salar]_gb
C4088_c0_seq1_	1.29224	0.0489383	_PREDICTED:_ankyrin-3-like_isoform_3_[Nomascus_leucogenys]
C3095_c3_seq1_	1.29112	0.0408501	_PREDICTED:_hypothetical_protein_LOC100701064_[Oreochromis_niloticus]
C48629_c0_seq1_	-1.3739	0.0293153	_myoblast_determination_protein_1_homolog_1_[Oncorhynchus_mykiss]_sp
C3048_c0_seq1_	-1.40417	0.0185621	_Peroxiredoxin-1_[Caligus_clemensi]
C2423_c2_seq1_	-1.44169	0.0455448	_Non-histone_chromosomal_protein_H6_[Salmo_salar]_gb
C1681_c2_seq1_	-1.45948	0.0455448	_Synaptobrevin_homolog_ykt6_[Oncorhynchus_mykiss]
C65090_c0_seq1_	-1.47451	0.044134	_52_kDa_repressor_of_the_inhibitor_of_the_protein_kinase_[Danio_rerio]_gb
C38626_c0_seq1_	-1.49434	0.0408501	_R-ras_[Kryptolebias_marmoratus]
C11274_c0_seq1_	-1.53193	0.0142208	_Transmembrane_protein_33_[Salmo_salar]
C5425_c0_seq1_	-1.60881	0.0409662	_thioredoxin_interacting_protein_[Salmo_salar]_gb
C1859_c2_seq1_	-1.77826	0.00791953	_glutathione_peroxidase_1_[Oncorhynchus_mykiss]
C6687_c1_seq1_	-1.80834	0.0239864	_Actin-related_protein_2/3_complex_subunit_5_[Salmo_salar]_gb
C13634_c0_seq1_	-1.81492	0.0257162	_EH_domain-containing_protein_1_[Danio_rerio]_gb
C33846_c1_seq1_	-1.81698	0.0185621	_PREDICTED:_poly_[ADP-ribose]_polymerase_9-like_[Cavia_porcellus]
C17547_c7_seq1_	-1.92829	0.00964989	_Leukocyte_elastase_inhibitor_[Salmo_salar]_gb
C37976_c0_seq1_	-1.97034	0.0371619	_ankyrin_repeat_domain_1_[Salmo_salar]
C1630_c2_seq1_	-2.0366	0.0185621	_PREDICTED:_perilipin-1_[Danio_rerio]
